# Supplementary material for: Meta-analysis of GWAS on both Chinese and European populations identifies GPR173 as a novel X chromosome susceptibility gene for SLE
Source: Springer Nature journal article supplement (doi:10.1186/s13075-018-1590-3), 2018-05-03

## Supplementary Tables

**Supplementary Table 1. Complete list of ChIP-seq files used in Intragenomic Replicates (IGR) analysis.**

| ChIP-seq files for transcription factor binding | Transcription factor | Cell line |
|-------------------------------------------------|----------------------|-----------|
| ENCFF225MPC.bed                                 | ARID1B               | K562      |
| ENCFF002DDJ.bed                                 | CTCF                 | K562      |
| ENCFF002CLT.bed                                 | CTCF                 | K562      |
| ENCFF002CMA.bed                                 | GATA2                | K562      |
| ENCFF185QPE.bed                                 | HDAC1                | K562      |
| ENCFF002CWC.bed                                 | JUN                  | K562      |
| ENCFF738WCE.bed                                 | KDM1A                | K562      |
| ENCFF468PSZ.bed                                 | L3MBTL2              | K562      |
| ENCFF986MHU.bed                                 | NFXL1                | K562      |
| ENCFF657YIC.bed                                 | NRF1                 | K562      |
| ENCFF002CWK.bed                                 | RCOR1                | K562      |
| ENCFF197YHU.bed                                 | SMARCA4              | K562      |
| ENCFF002CYH.bed                                 | TAL1                 | K562      |
| ENCFF447QUG.bed                                 | ZNF512               | K562      |
| ENCFF002COK.bed                                 | BHLHE40              | GM12878   |
| ENCFF002COQ.bed                                 | CTCF                 | GM12878   |
| ENCFF002COR.bed                                 | E2F4                 | GM12878   |

|                                         |                |         |
|-----------------------------------------|----------------|---------|
| ENCFF002CGW.bed                         | EGR1           | GM12878 |
| ENCFF002CGX.bed                         | ELF1           | GM12878 |
| ENCFF002COT.bed                         | ELK1           | GM12878 |
| ENCFF002COW.bed                         | MAX            | GM12878 |
| ENCFF002COX.bed                         | MAZ            | GM12878 |
| ENCFF002CPA.bed                         | RELA           | GM12878 |
| ENCFF002CPD.bed                         | NRF1           | GM12878 |
| ENCFF002CPH.bed                         | POLR2A         | GM12878 |
| ENCFF002CHP.bed                         | POU2F2         | GM12878 |
| ENCFF002CPK.bed                         | RAD21          | GM12878 |
| ENCFF002CHS.bed                         | RUNX3          | GM12878 |
| ENCFF002CPN.bed                         | SMC3           | GM12878 |
| ENCFF002CHV.bed                         | SP1            | GM12878 |
| ENCFF002CHW.bed                         | SRF            | GM12878 |
| ENCFF002CHY.bed                         | TAF1           | GM12878 |
| ENCFF812DEY.bed                         | TCF7L2         | K562    |
| ENCFF002CIC.bed                         | YY1            | GM12878 |
| ENCFF002CPW.bed                         | ZNF143         | GM12878 |
| ChIP-seq files for DHS                  |                |         |
| wgEncodeUwDnaseK562PkRep1.narrowPeak    | Not applicable | K562    |
| wgEncodeUwDnaseGm12878PkRep1.narrowPeak | Not applicable | GM12878 |

**Supplementary Table 2. List of the 48 SNPs with association  $P_{gwas}$  value smaller than 1E-04, after removing the previously reported SNPs and the SNPs surrounding them ( $\pm 200$  kb). The novel signal (rs13440883) reported in the current study is labeled in bold.**

| Gene                   | Function   | SNP         | Position | Direction | $P_{gwas}$ | OR <sub>gwas</sub> | $P_{adj}$ | OR <sub>adj</sub> | $I^2$ | HetPVal |
|------------------------|------------|-------------|----------|-----------|------------|--------------------|-----------|-------------------|-------|---------|
| <i>VCX2, VCX3B</i>     | intergenic | rs111682547 | 8183477  | ---+??    | 3.14E-05   | 0.59               | 4.83E-05  | 0.60              | 0     | 0.50    |
| <i>VCX2, VCX3B</i>     | intergenic | rs145425115 | 8211854  | +++~??    | 3.16E-05   | 1.69               | 4.20E-05  | 1.68              | 0     | 0.45    |
| <i>MSL3, FRMPD4</i>    | intergenic | rs6640789   | 11857936 | ----??    | 4.68E-05   | 0.81               | 1.16E-04  | 0.81              | 0     | 0.83    |
| <i>YY2</i>             | UTR5       | rs2382759   | 21874387 | ---+--    | 6.67E-05   | 0.90               | 8.44E-05  | 0.90              | 29.3  | 0.22    |
| <i>MBTPS2</i>          | UTR3       | rs5951476   | 21901903 | ++~+++    | 6.34E-05   | 1.11               | 8.75E-05  | 1.11              | 40.4  | 0.14    |
| <i>DMD</i>             | intronic   | rs5928194   | 33207009 | ??+~??    | 5.55E-05   | 1.34               | 6.45E-05  | 1.34              | 0     | 0.89    |
| <i>MAGED1</i>          | intronic   | rs12863962  | 51581783 | ????~     | 6.93E-05   | 0.83               | 6.93E-05  | 0.83              | 0     | 0.50    |
| <i>FAM156A, GPR173</i> | intergenic | rs12011862  | 53059319 | ++++++    | 8.15E-05   | 1.12               | 8.11E-05  | 1.12              | 0     | 0.72    |
| <i>FAM156A, GPR173</i> | intergenic | rs68049065  | 53060045 | -----     | 9.56E-05   | 0.89               | 1.03E-04  | 0.89              | 0     | 0.57    |
| <i>FAM156A, GPR173</i> | intergenic | rs12014182  | 53065809 | ---+--    | 6.61E-05   | 0.89               | 7.21E-05  | 0.89              | 0     | 0.56    |
| <i>FAM156A, GPR173</i> | intergenic | rs12400146  | 53071436 | +++~++    | 5.64E-05   | 1.13               | 5.97E-05  | 1.13              | 0     | 0.61    |
| <i>GPR173</i>          | intronic   | rs55850908  | 53081414 | -----     | 1.10E-05   | 0.88               | 1.70E-05  | 0.88              | 0     | 0.69    |
| <i>GPR173</i>          | intronic   | rs59180338  | 53081558 | -----     | 1.08E-05   | 0.87               | 1.66E-05  | 0.88              | 0     | 0.69    |
| <i>GPR173</i>          | intronic   | rs67791620  | 53081814 | -----     | 7.13E-05   | 0.88               | 9.17E-05  | 0.88              | 0     | 0.69    |
| <i>GPR173</i>          | intronic   | rs67450314  | 53081970 | -----     | 1.45E-05   | 0.88               | 2.13E-05  | 0.88              | 0     | 0.69    |
| <i>GPR173</i>          | intronic   | rs12392162  | 53082363 | -----     | 1.70E-05   | 0.88               | 2.50E-05  | 0.88              | 0     | 0.66    |
| <i>GPR173</i>          | intronic   | rs12007081  | 53084492 | -----     | 2.07E-05   | 0.88               | 3.09E-05  | 0.88              | 0     | 0.67    |
| <i>GPR173</i>          | intronic   | rs12013318  | 53084568 | ++++++    | 2.42E-05   | 1.14               | 3.60E-05  | 1.13              | 0     | 0.68    |
| <i>GPR173</i>          | intronic   | rs7473078   | 53084799 | -----     | 2.07E-05   | 0.88               | 3.09E-05  | 0.88              | 0     | 0.67    |
| <i>GPR173</i>          | intronic   | rs67457527  | 53085169 | ++++++    | 1.72E-05   | 1.14               | 2.58E-05  | 1.14              | 0     | 0.69    |
| <i>GPR173</i>          | intronic   | rs12389147  | 53086749 | ++++++    | 1.70E-05   | 1.14               | 2.42E-05  | 1.14              | 0     | 0.86    |

|                         |                 |                   |                 |               |                 |             |                 |             |          |             |
|-------------------------|-----------------|-------------------|-----------------|---------------|-----------------|-------------|-----------------|-------------|----------|-------------|
| <i>GPR173</i>           | intronic        | rs12390489        | 53087476        | ++++++        | 2.46E-05        | 1.14        | 3.80E-05        | 1.13        | 0        | 0.76        |
| <i>GPR173</i>           | intronic        | rs67171574        | 53087835        | -----         | 1.25E-05        | 0.88        | 1.97E-05        | 0.88        | 0        | 0.79        |
| <i>GPR173</i>           | intronic        | rs189101417       | 53089213        | ++++++        | 4.56E-05        | 1.13        | 7.33E-05        | 1.13        | 0        | 0.65        |
| <i>GPR173</i>           | intronic        | rs10855213        | 53090536        | ++++++        | 1.59E-05        | 1.14        | 2.59E-05        | 1.13        | 0        | 0.71        |
| <i>GPR173</i>           | intronic        | rs73634281        | 53095639        | -----         | 1.12E-05        | 0.88        | 1.86E-05        | 0.88        | 0        | 0.73        |
| <i>GPR173</i>           | intronic        | rs67733752        | 53096176        | -----         | 1.07E-05        | 0.88        | 1.78E-05        | 0.88        | 0        | 0.72        |
| <i>GPR173</i>           | intronic        | rs28585589        | 53098061        | ---+--        | 8.17E-05        | 0.88        | 1.43E-04        | 0.88        | 0        | 0.84        |
| <i>GPR173</i>           | intronic        | rs111655908       | 53098327        | +++--+        | 8.52E-05        | 1.14        | 1.50E-04        | 1.13        | 0        | 0.84        |
| <i>GPR173</i>           | intronic        | rs112167847       | 53100196        | ---+--        | 4.60E-05        | 0.88        | 8.17E-05        | 0.88        | 0        | 0.84        |
| <i>GPR173</i>           | intronic        | rs12389413        | 53100590        | -----         | 1.06E-05        | 0.88        | 1.79E-05        | 0.88        | 0        | 0.74        |
| <i>GPR173</i>           | intronic        | rs73634282        | 53101228        | ++++++        | 1.04E-05        | 1.14        | 1.73E-05        | 1.14        | 0        | 0.76        |
| <b><i>GPR173</i></b>    | <b>intronic</b> | <b>rs13440883</b> | <b>53101477</b> | <b>++++++</b> | <b>7.74E-06</b> | <b>1.15</b> | <b>1.25E-05</b> | <b>1.14</b> | <b>0</b> | <b>0.83</b> |
| <i>GPR173</i>           | intronic        | rs7881236         | 53101684        | ---+--        | 5.39E-05        | 0.87        | 9.21E-05        | 0.88        | 0        | 0.68        |
| <i>GPR173</i>           | intronic        | rs7883255         | 53101934        | ++++++        | 6.27E-06        | 1.15        | 1.10E-05        | 1.15        | 0        | 0.78        |
| <i>GPR173</i>           | intronic        | rs7473421         | 53102956        | ++++++        | 2.13E-05        | 1.14        | 3.72E-05        | 1.14        | 0        | 0.81        |
| <i>GPR173</i>           | intronic        | rs12388258        | 53105196        | ++++++        | 4.66E-05        | 1.14        | 7.14E-05        | 1.13        | 0        | 0.92        |
| <i>GPR173</i>           | exonic          | rs11091720        | 53106865        | -----         | 6.40E-05        | 0.88        | 9.52E-05        | 0.88        | 0        | 0.92        |
| <i>GPR173</i>           | UTR3            | rs56157110        | 53107941        | -----         | 4.62E-05        | 0.88        | 7.15E-05        | 0.88        | 0        | 0.94        |
| <i>RNF128, TBC1D8B</i>  | intergenic      | rs73247960        | 106044726       | -----         | 9.86E-05        | 0.90        | 1.88E-04        | 0.90        | 24.5     | 0.25        |
| <i>TBC1D8B, RIPPLY1</i> | intergenic      | rs4409525         | 106140325       | -----         | 5.40E-05        | 0.90        | 1.05E-04        | 0.90        | 0        | 0.54        |
| <i>HMGB3, MIR4330</i>   | intergenic      | rs3866987         | 150231297       | +-----        | 7.74E-05        | 1.11        | 9.95E-05        | 1.11        | 4.8      | 0.39        |
| <i>F8</i>               | intronic        | rs6655259         | 154228944       | ????--        | 9.59E-05        | 0.73        | 9.59E-05        | 0.73        | 0        | 0.60        |
| <i>F8</i>               | intronic        | rs113298253       | 154239725       | ????--        | 6.52E-05        | 0.73        | 6.52E-05        | 0.73        | 0        | 0.67        |
| <i>FUNDC2</i>           | intronic        | rs113884477       | 154276531       | ????--        | 4.58E-05        | 0.72        | 4.58E-05        | 0.72        | 0        | 0.72        |
| <i>FUNDC2</i>           | intronic        | rs113240511       | 154277000       | ????--        | 6.41E-05        | 0.73        | 6.41E-05        | 0.73        | 0        | 0.65        |

|               |            |             |           |        |          |      |          |      |   |      |
|---------------|------------|-------------|-----------|--------|----------|------|----------|------|---|------|
| <i>FUNDC2</i> | intronic   | rs111262877 | 154281330 | ????-- | 5.28E-05 | 0.72 | 5.28E-05 | 0.72 | 0 | 0.68 |
| <i>FUNDC2</i> | downstream | rs111837982 | 154285625 | ????-- | 7.97E-05 | 0.73 | 7.97E-05 | 0.73 | 0 | 0.66 |

---

**Supplementary Table 3. List of the candidate X-linked SLE susceptibility genes.** The SNP (rs13440883) with genome wide significance identified in the current study is labeled in bold.

| Gene                    | Function        | SNP               | Position        | Direction | $P_{gwas}$      | OR <sub>gwas</sub> | $P_{adj}$       | OR <sub>adj</sub> | I <sup>2</sup> | HetPVal     |
|-------------------------|-----------------|-------------------|-----------------|-----------|-----------------|--------------------|-----------------|-------------------|----------------|-------------|
| <i>VCX2, VCX3B</i>      | intergenic      | rs145425115       | 8211854         | +++??     | 3.16E-05        | 1.69               | 4.20E-05        | 1.68              | 0              | 0.45        |
| <i>MSL3, FRMPD4</i>     | intergenic      | rs6640789         | 11857936        | ----??    | 4.68E-05        | 0.81               | 1.16E-04        | 0.81              | 0              | 0.83        |
| <i>MBTPS2</i>           | UTR3            | rs5951476         | 21901903        | ++-+++    | 6.34E-05        | 1.11               | 8.75E-05        | 1.11              | 40.4           | 0.14        |
| <i>DMD</i>              | intronic        | rs5928194         | 33207009        | ??++??    | 5.55E-05        | 1.34               | 6.45E-05        | 1.34              | 0              | 0.89        |
| <i>MAGED1</i>           | intronic        | rs12863962        | 51581783        | ????--    | 6.93E-05        | 0.83               | 6.93E-05        | 0.83              | 0              | 0.50        |
| <b><i>GPR173</i></b>    | <b>intronic</b> | <b>rs13440883</b> | <b>53101477</b> | ++++++    | <b>7.74E-06</b> | <b>1.15</b>        | <b>1.25E-05</b> | <b>1.14</b>       | <b>0</b>       | <b>0.83</b> |
| <i>TBC1D8B, RIPPLY1</i> | intergenic      | rs4409525         | 106140325       | -----     | 5.40E-05        | 0.90               | 1.05E-04        | 0.90              | 0              | 0.54        |
| <i>HMGB3, MIR4330</i>   | intergenic      | rs3866987         | 150231297       | +-----    | 7.74E-05        | 1.11               | 9.95E-05        | 1.11              | 4.8            | 0.39        |
| <i>F8</i>               | intronic        | rs6655259         | 154228944       | ????--    | 9.59E-05        | 0.73               | 9.59E-05        | 0.73              | 0              | 0.60        |

**Supplementary Table 4. List of the 88 SNPs surpassing genome wide significance (5E-08) in *LICAM-MECP2* region.** The SNPs are ordered by position and separated by LD block. SNPs used in conditional regression are labeled in bold. Previously identified independent SNPs are labeled in green. And the novel independent SNP rs5987175 is labeled in red.

| SNP              | Position         | Direction | $P_{gwas}$      | OR <sub>gwas</sub> | $P_{adj}$       | OR <sub>adj</sub> | $I^2$       | HetPVal       |
|------------------|------------------|-----------|-----------------|--------------------|-----------------|-------------------|-------------|---------------|
| rs4646263        | 153140449        | -----     | 7.75E-09        | 0.85               | 1.45E-08        | 0.86              | 0           | 0.7315        |
| rs12156710       | 153150791        | -----     | 1.41E-08        | 0.85               | 2.23E-08        | 0.86              | 22.1        | 0.2676        |
| rs41311376       | 153150929        | -----     | 6.56E-09        | 0.85               | 8.90E-09        | 0.85              | 27          | 0.2318        |
| rs73627240       | 153151939        | -----     | 4.15E-09        | 0.85               | 5.44E-09        | 0.85              | 0           | 0.4604        |
| rs73627241       | 153152126        | -----     | 3.95E-09        | 0.85               | 5.16E-09        | 0.85              | 0           | 0.4619        |
| rs5945168        | 153152760        | -----     | 5.85E-09        | 0.85               | 7.53E-09        | 0.85              | 0           | 0.4942        |
| <b>rs5987175</b> | <b>153153839</b> | -----     | <b>1.21E-09</b> | <b>0.85</b>        | <b>1.50E-09</b> | <b>0.85</b>       | <b>16.1</b> | <b>0.3099</b> |
| rs4898456        | 153155214        | -----     | 2.38E-09        | 0.85               | 3.12E-09        | 0.85              | 0           | 0.5429        |
| rs5945365        | 153156390        | +++++++   | 6.24E-09        | 1.17               | 8.42E-09        | 1.17              | 0           | 0.6785        |
| rs4898457        | 153158356        | -----     | 2.97E-09        | 0.85               | 4.11E-09        | 0.85              | 2.8         | 0.3984        |
| rs5945169        | 153162037        | +++++++   | 7.73E-09        | 1.17               | 1.00E-08        | 1.17              | 0           | 0.7636        |
| rs7052686        | 153162462        | -----     | 6.50E-09        | 0.85               | 8.59E-09        | 0.85              | 0           | 0.5192        |
| rs7886319        | 153162986        | +++++++   | 1.07E-08        | 1.17               | 1.27E-08        | 1.17              | 0           | 0.5866        |
| rs5987179        | 153163197        | +++++++   | 1.80E-08        | 1.17               | 2.41E-08        | 1.16              | 0           | 0.4617        |
| rs5945367        | 153164342        | -----     | 1.54E-09        | 0.85               | 2.22E-09        | 0.85              | 0           | 0.5416        |
| rs5945368        | 153165516        | -----     | 2.43E-09        | 0.85               | 3.64E-09        | 0.85              | 0           | 0.7698        |
| rs5945369        | 153165804        | +++++++   | 2.52E-08        | 1.17               | 3.63E-08        | 1.17              | 0           | 0.7147        |
| rs5945370        | 153165883        | -----     | 2.93E-09        | 0.85               | 4.39E-09        | 0.85              | 0           | 0.7607        |
| rs2872601        | 153166009        | -----     | 2.53E-09        | 0.85               | 3.77E-09        | 0.85              | 0           | 0.7713        |

|                |                  |        |                 |             |                 |             |          |             |
|----------------|------------------|--------|-----------------|-------------|-----------------|-------------|----------|-------------|
| rs4898458      | 153167690        | ++++++ | 3.35E-09        | 1.17        | 3.66E-09        | 1.17        | 0        | 0.4417      |
| rs3761528      | 153168449        | ++++++ | 3.95E-08        | 1.16        | 4.26E-08        | 1.16        | 0        | 0.564       |
| rs2269372      | 153207545        | ++++++ | 7.52E-15        | 1.27        | 1.74E-14        | 1.26        | 0        | 0.74        |
| rs2269373      | 153207925        | -----  | 4.20E-15        | 0.79        | 1.05E-14        | 0.79        | 0        | 0.76        |
| rs4898465      | 153208140        | -----  | 3.37E-15        | 0.79        | 8.68E-15        | 0.79        | 0        | 0.75        |
| rs3027869      | 153211538        | -----  | 2.77E-14        | 0.79        | 6.06E-14        | 0.79        | 0        | 0.68        |
| rs762656       | 153211652        | ++++++ | 4.86E-14        | 1.26        | 1.08E-13        | 1.25        | 0        | 0.66        |
| rs2071132      | 153216036        | -----  | 3.08E-14        | 0.8         | 7.32E-14        | 0.80        | 0        | 0.67        |
| rs3027878      | 153218365        | -----  | 7.13E-16        | 0.77        | 1.63E-15        | 0.77        | 0        | 0.49        |
| rs762653       | 153218920        | -----  | 2.29E-16        | 0.77        | 4.99E-16        | 0.77        | 0        | 0.58        |
| rs2071133      | 153219665        | -----  | 1.97E-14        | 0.79        | 5.42E-14        | 0.80        | 0        | 0.66        |
| rs1051152      | 153220360        | ++++++ | 3.17E-14        | 1.26        | 8.20E-14        | 1.25        | 0        | 0.62        |
| rs730106       | 153221657        | ++++++ | 1.78E-14        | 1.26        | 4.61E-14        | 1.25        | 0        | 0.58        |
| rs2071134      | 153222835        | -----  | 1.24E-16        | 0.77        | 2.88E-16        | 0.77        | 0        | 0.58        |
| <b>rs17421</b> | <b>153225634</b> | -----  | <b>3.61E-17</b> | <b>0.77</b> | <b>9.87E-17</b> | <b>0.77</b> | <b>0</b> | <b>0.74</b> |
| rs632          | 153226471        | ++++++ | 2.16E-14        | 1.26        | 5.57E-14        | 1.25        | 0        | 0.59        |
| rs17422        | 153227426        | ++++++ | 1.66E-14        | 1.26        | 4.42E-14        | 1.25        | 0        | 0.6         |
| rs59607260     | 153227770        | -----  | 1.75E-14        | 0.79        | 4.48E-14        | 0.79        | 0        | 0.62        |
| rs2266886      | 153231352        | ++++++ | 1.32E-14        | 1.26        | 3.63E-14        | 1.26        | 0        | 0.66        |
| rs6655268      | 153238288        | ++++++ | 8.54E-14        | 1.26        | 1.93E-13        | 1.25        | 0        | 0.57        |
| rs2266887      | 153239587        | -----  | 2.64E-14        | 0.8         | 6.87E-14        | 0.80        | 0        | 0.61        |
| rs2266888      | 153239720        | -----  | 2.28E-14        | 0.79        | 5.84E-14        | 0.80        | 0        | 0.62        |
| rs4898374      | 153241386        | -----  | 1.66E-14        | 0.79        | 4.35E-14        | 0.79        | 0        | 0.63        |
| rs5945172      | 153243315        | ++++++ | 8.69E-15        | 1.26        | 2.25E-14        | 1.26        | 0        | 0.61        |



|                |                  |        |                 |             |                 |             |          |             |
|----------------|------------------|--------|-----------------|-------------|-----------------|-------------|----------|-------------|
| rs12384878     | 153245128        | ++++++ | 5.39E-15        | 1.27        | 1.38E-14        | 1.27        | 0        | 0.63        |
| rs113339491    | 153245217        | -----  | 3.58E-15        | 0.79        | 9.18E-15        | 0.79        | 0        | 0.64        |
| rs6643653      | 153246018        | ++++++ | 2.07E-14        | 1.27        | 5.41E-14        | 1.26        | 0        | 0.61        |
| rs2266890      | 153247722        | -----  | 9.22E-15        | 0.79        | 3.66E-14        | 0.79        | 0        | 0.75        |
| rs7350355      | 153247745        | ++++++ | 6.84E-15        | 1.26        | 2.80E-14        | 1.26        | 0        | 0.74        |
| rs6571303      | 153247954        | -----  | 7.25E-15        | 0.79        | 2.96E-14        | 0.79        | 0        | 0.73        |
| <b>rs13397</b> | <b>153248248</b> | -----  | <b>1.34E-16</b> | <b>0.77</b> | <b>4.75E-16</b> | <b>0.77</b> | <b>0</b> | <b>0.47</b> |
| rs5945173      | 153250172        | -----  | 3.08E-14        | 0.79        | 1.15E-13        | 0.80        | 0        | 0.73        |
| rs6643808      | 153252147        | ++++++ | 9.60E-15        | 1.27        | 4.27E-14        | 1.26        | 0        | 0.66        |
| rs6643809      | 153252908        | ++++++ | 1.95E-14        | 1.26        | 8.15E-14        | 1.26        | 0        | 0.66        |
| rs6643656      | 153254605        | ++++++ | 2.29E-13        | 1.26        | 6.38E-13        | 1.26        | 0        | 0.69        |
| rs6655269      | 153256435        | -----  | 2.13E-15        | 0.78        | 8.22E-15        | 0.79        | 0        | 0.46        |
| rs5986947      | 153256505        | -----  | 1.37E-15        | 0.78        | 5.41E-15        | 0.79        | 0        | 0.48        |
| rs5945384      | 153260414        | ++++++ | 8.82E-14        | 1.26        | 2.91E-13        | 1.26        | 0        | 0.48        |
| rs11795678     | 153265728        | ++++++ | 2.64E-14        | 1.27        | 4.40E-14        | 1.27        | 30.3     | 0.21        |
| rs5945386      | 153269755        | ++++++ | 3.70E-14        | 1.27        | 5.86E-14        | 1.27        | 35.5     | 0.17        |
| rs4898375      | 153273226        | -----  | 3.79E-16        | 0.76        | 5.26E-16        | 0.77        | 22.3     | 0.27        |
| rs633          | 153274228        | ++++++ | 3.91E-13        | 1.25        | 6.72E-13        | 1.25        | 40.6     | 0.13        |
| rs12400188     | 153275075        | ++++++ | 2.80E-13        | 1.25        | 4.84E-13        | 1.25        | 40.1     | 0.14        |
| rs3027898      | 153275890        | ++++++ | 8.07E-13        | 1.24        | 1.32E-12        | 1.24        | 43.5     | 0.12        |
| rs731642       | 153277507        | -----  | 2.74E-14        | 0.79        | 4.38E-14        | 0.79        | 39.1     | 0.14        |
| rs2239673      | 153277889        | ++++++ | 5.65E-13        | 1.25        | 9.77E-13        | 1.25        | 43.7     | 0.11        |
| rs763737       | 153278307        | ++++++ | 1.90E-13        | 1.25        | 3.32E-13        | 1.25        | 40.2     | 0.14        |
| rs5945174      | 153279858        | ++++++ | 9.25E-14        | 1.25        | 1.76E-13        | 1.25        | 41.9     | 0.13        |

|                  |                  |        |                 |             |                 |             |             |             |
|------------------|------------------|--------|-----------------|-------------|-----------------|-------------|-------------|-------------|
| rs7061789        | 153280475        | ++++++ | 8.93E-14        | 1.25        | 1.70E-13        | 1.25        | 41.6        | 0.13        |
| <b>rs1059702</b> | <b>153284192</b> | -----  | <b>1.12E-16</b> | <b>0.76</b> | <b>1.84E-16</b> | <b>0.76</b> | <b>22.8</b> | <b>0.26</b> |
| rs1059701        | 153284483        | ++++++ | 1.34E-13        | 1.25        | 2.57E-13        | 1.25        | 43.5        | 0.12        |
| rs2734647        | 153292180        | -----  | 4.12E-16        | 0.77        | 4.40E-16        | 0.77        | 5.9         | 0.38        |
| rs2075596        | 153297392        | -----  | 1.57E-16        | 0.76        | 2.04E-16        | 0.76        | 3.8         | 0.39        |
| rs3027933        | 153298874        | ++++++ | 1.16E-16        | 1.32        | 1.67E-16        | 1.32        | 0           | 0.5         |
| rs4898467        | 153299924        | ++++++ | 7.80E-12        | 1.24        | 1.28E-11        | 1.23        | 38          | 0.15        |
| rs5987194        | 153301467        | -----  | 4.00E-16        | 0.76        | 6.50E-16        | 0.76        | 0           | 0.47        |
| rs76613700       | 153301653        | ++++++ | 3.90E-12        | 1.25        | 6.23E-12        | 1.24        | 27          | 0.23        |
| rs909131         | 153308227        | ++++++ | 1.11E-11        | 1.24        | 1.71E-11        | 1.24        | 28.1        | 0.22        |
| rs17435          | 153311980        | ++++++ | 5.29E-12        | 1.24        | 8.41E-12        | 1.24        | 23.5        | 0.26        |
| rs1624766        | 153317154        | ++++++ | 1.25E-12        | 1.25        | 2.16E-12        | 1.25        | 28          | 0.22        |
| rs1734787        | 153325446        | ++++++ | 7.97E-16        | 1.3         | 1.28E-15        | 1.30        | 0           | 0.43        |
| rs1616369        | 153326464        | -----  | 3.92E-16        | 0.77        | 6.30E-16        | 0.77        | 3.3         | 0.4         |
| rs1734791        | 153330920        | ++++++ | 6.98E-16        | 1.3         | 1.12E-15        | 1.30        | 0           | 0.44        |
| rs1734789        | 153331463        | ++++++ | 2.21E-12        | 1.25        | 4.00E-12        | 1.24        | 18.9        | 0.29        |
| rs1734792        | 153341060        | -----  | 3.53E-15        | 0.77        | 4.56E-15        | 0.77        | 5.4         | 0.38        |
| rs2239464        | 153348431        | -----  | 5.34E-13        | 0.8         | 9.49E-13        | 0.80        | 11.8        | 0.34        |
| rs5945393        | 153349428        | ++++++ | 6.48E-13        | 1.25        | 1.17E-12        | 1.25        | 7.5         | 0.37        |
| rs5986957        | 153372505        | -----  | 1.93E-14        | 0.78        | 2.53E-14        | 0.78        | 0           | 0.52        |
| rs2872736        | 153376436        | ++++++ | 1.66E-11        | 1.24        | 2.77E-11        | 1.23        | 12.7        | 0.33        |

---

**Supplementary Table 5. Conditional logistic regression results in both Asian GWAS and European GWAS.**

| CHR | SNP       | BP        | conditional on | TEST | Population | OR   | <i>P</i> |
|-----|-----------|-----------|----------------|------|------------|------|----------|
| 23  | rs17421   | 153225634 | rs5987175      | ADD  | Asian      | 0.80 | 1.27E-03 |
| 23  | rs13397   | 153248248 | rs5987175      | ADD  | Asian      | 0.82 | 7.99E-04 |
| 23  | rs1059702 | 153284192 | rs5987175      | ADD  | Asian      | 0.73 | 9.21E-06 |
| 23  | rs5987175 | 153153839 | rs17421        | ADD  | Asian      | 0.84 | 4.55E-03 |
| 23  | rs5987175 | 153153839 | rs13397        | ADD  | Asian      | 0.82 | 1.18E-03 |
| 23  | rs5987175 | 153153839 | rs1059702      | ADD  | Asian      | 0.85 | 6.53E-03 |
| 23  | rs17421   | 153225634 | rs5987175      | ADD  | European   | 1.30 | 1.05E-06 |
| 23  | rs13397   | 153248248 | rs5987175      | ADD  | European   | 1.34 | 4.38E-07 |
| 23  | rs1059702 | 153284192 | rs5987175      | ADD  | European   | 1.32 | 2.20E-07 |
| 23  | rs5987175 | 153153839 | rs17421        | ADD  | European   | 1.02 | 6.90E-01 |
| 23  | rs5987175 | 153153839 | rs13397        | ADD  | European   | 1.02 | 7.25E-01 |
| 23  | rs5987175 | 153153839 | rs1059702      | ADD  | European   | 1.01 | 7.54E-01 |

**Supplementary Table 6. The list of SNVs used in Supplementary Figure 3A, from left to right.** The LD pattern ( $r^2$ ) was calculated by the GWAS data used in the current study. Both  $r^2_{\text{Asian}}$  and  $r^2_{\text{EUR}}$  indicate the LD with rs13440883.

| SNP         | position | $r^2_{\text{EUR}}$ | $r^2_{\text{Asian}}$ |
|-------------|----------|--------------------|----------------------|
| rs7877051   | 53071117 | 0.861689           | 0.498914             |
| rs12399047  | 53071395 | 0.861566           | 0.497459             |
| rs12400146  | 53071436 | 0.946979           | 0.692429             |
| rs12399101  | 53071739 | 0.861689           | 0.498914             |
| rs12399506  | 53072170 | 0.857985           | 0.482277             |
| rs12400638  | 53072247 | 0.861689           | 0.500104             |
| rs138701413 | 53072485 | 0.0604902          | 0.14709              |
| rs73208441  | 53072602 | 0.861689           | 0.500244             |
| rs73208442  | 53073113 | 0.881332           | 0.510207             |
| rs13440965  | 53073712 | 0.0639324          | 0.156498             |
| rs112815541 | 53074480 | 0.884532           | 0.511242             |
| rs112413992 | 53074894 | 0.884532           | 0.511504             |
| rs7886006   | 53076374 | 0.885273           | 0.510429             |
| rs7880612   | 53076716 | 0.885273           | 0.508845             |
| rs73634274  | 53077071 | 0.0630602          | 0.130132             |
| rs113951189 | 53077747 | 0.894437           | 0.59347              |
| rs73634275  | 53077998 | 0.0614544          | 0.147077             |
| rs73634276  | 53079845 | 0.0623265          | 0.151298             |
| rs55850908  | 53081414 | 0.987087           | 0.992071             |
| rs59180338  | 53081558 | 0.987087           | 0.992072             |
| rs67791620  | 53081814 | 0.976957           | 0.96523              |
| rs67450314  | 53081970 | 0.98554            | 0.992044             |
| rs12392162  | 53082363 | 0.986654           | 0.992059             |
| rs12007081  | 53084492 | 0.987454           | 0.994511             |
| rs12013318  | 53084568 | 0.991464           | 0.995301             |
| rs7473078   | 53084799 | 0.987454           | 0.994514             |
| rs67457527  | 53085169 | 0.987454           | 0.994521             |
| rs73208449  | 53085633 | 0.892317           | 0.759438             |
| rs145795871 | 53086455 | 0.0626712          | 0.157675             |
| rs12389147  | 53086749 | 0.983831           | 0.971481             |
| rs12390489  | 53087476 | 0.987081           | 0.996143             |
| rs67171574  | 53087835 | 0.990739           | 0.996147             |
| rs183981514 | 53089211 | 0.982055           | 0.994541             |
| rs189101417 | 53089213 | 0.981784           | 0.994534             |
| rs10855213  | 53090536 | 0.992973           | 1                    |
| rs73634281  | 53095639 | 0.993692           | 0.999239             |

|                   |                 |                 |                 |
|-------------------|-----------------|-----------------|-----------------|
| rs67733752        | 53096176        | 0.993692        | 0.999239        |
| rs28585589        | 53098061        | 0.904899        | 0.769299        |
| rs111655908       | 53098327        | 0.904899        | 0.769213        |
| rs112167847       | 53100196        | 0.906056        | 0.770618        |
| rs12389413        | 53100590        | 1               | 0.999239        |
| rs73634282        | 53101228        | 0.997386        | 1               |
| rs138457679       | 53101263        | 0.0641387       | 0.168568        |
| <b>rs13440883</b> | <b>53101477</b> | <b>1</b>        | <b>1</b>        |
| rs7881236         | 53101684        | 0.899629        | 0.757807        |
| rs7883255         | 53101934        | 0.987427        | 0.996816        |
| rs7473421         | 53102956        | 0.983918        | 0.995967        |
| rs12388258        | 53105196        | 0.938446        | 0.990695        |
| rs17850567        | 53105890        | 0.860489        | 0.741897        |
| <b>rs11091720</b> | <b>53106865</b> | <b>0.938435</b> | <b>0.991546</b> |
| rs56157110        | 53107941        | 0.935763        | 0.990624        |
| rs7060542         | 53109075        | 0.936104        | 0.991478        |
| rs12399509        | 53110568        | 0.854483        | 0.638715        |
| rs183116083       | 53110747        | 0.92113         | 0.988417        |
| rs7885663         | 53114327        | 0.825134        | 0.810891        |
| rs12400540        | 53115705        | 0.767558        | 0.790158        |
| rs7891342         | 53115858        | 0.767735        | 0.78158         |
| rs7891374         | 53115909        | 0.767804        | 0.779391        |
| rs111433517       | 53116730        | 0.770995        | 0.480601        |
| rs5933619         | 53120346        | 0.767804        | 0.777532        |
| rs5933603         | 53124816        | 0.767804        | 0.759586        |
| rs5978191         | 53126941        | 0.768242        | 0.74213         |
| rs5978192         | 53126952        | 0.767559        | 0.74213         |

---

## Supplementary Figures

**Supplementary Figure 1. QQ plot for the cross-population X chromosome meta-analysis data.** The X-axis is the expected association  $P$  value ( $-\log_{10}P$ ), and the Y-axis is the observed association  $P$  value ( $-\log_{10}P$ ). The left panel (black) includes all of the SNPs available on X chromosome, and right panel (red) excludes all of the known X-linked SLE susceptibility loci and the SNPs within the range of  $\pm 200$  kb.

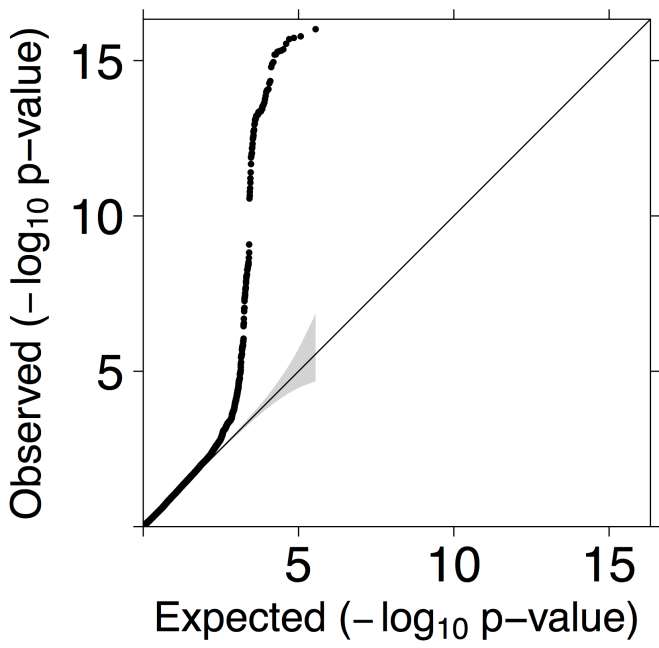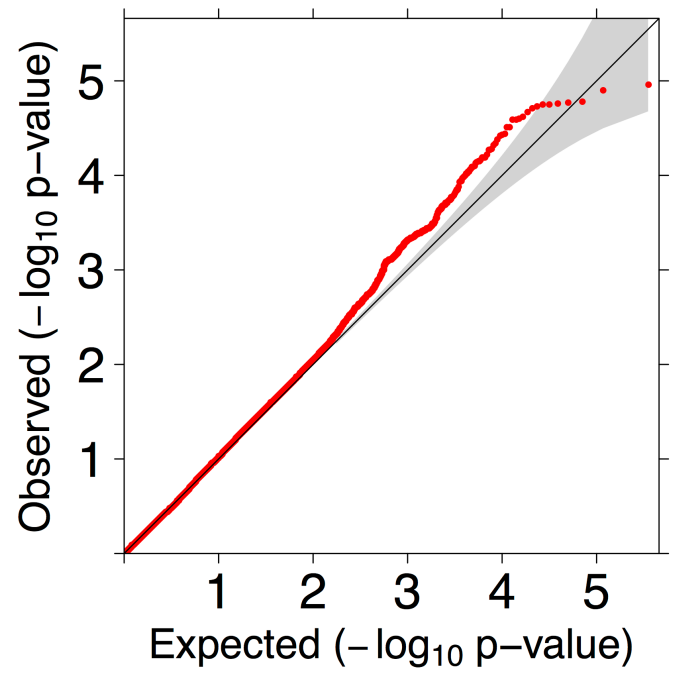

**Supplementary Figure 2. The LocusZoom Plots showing association significance ( $-\log_{10}P$ ) and local LD ( $r^2$ ) for the region around rs13440883 ( $\pm 200\text{kb}$ ). Validated SNP rs13440883 is labeled in purple.**



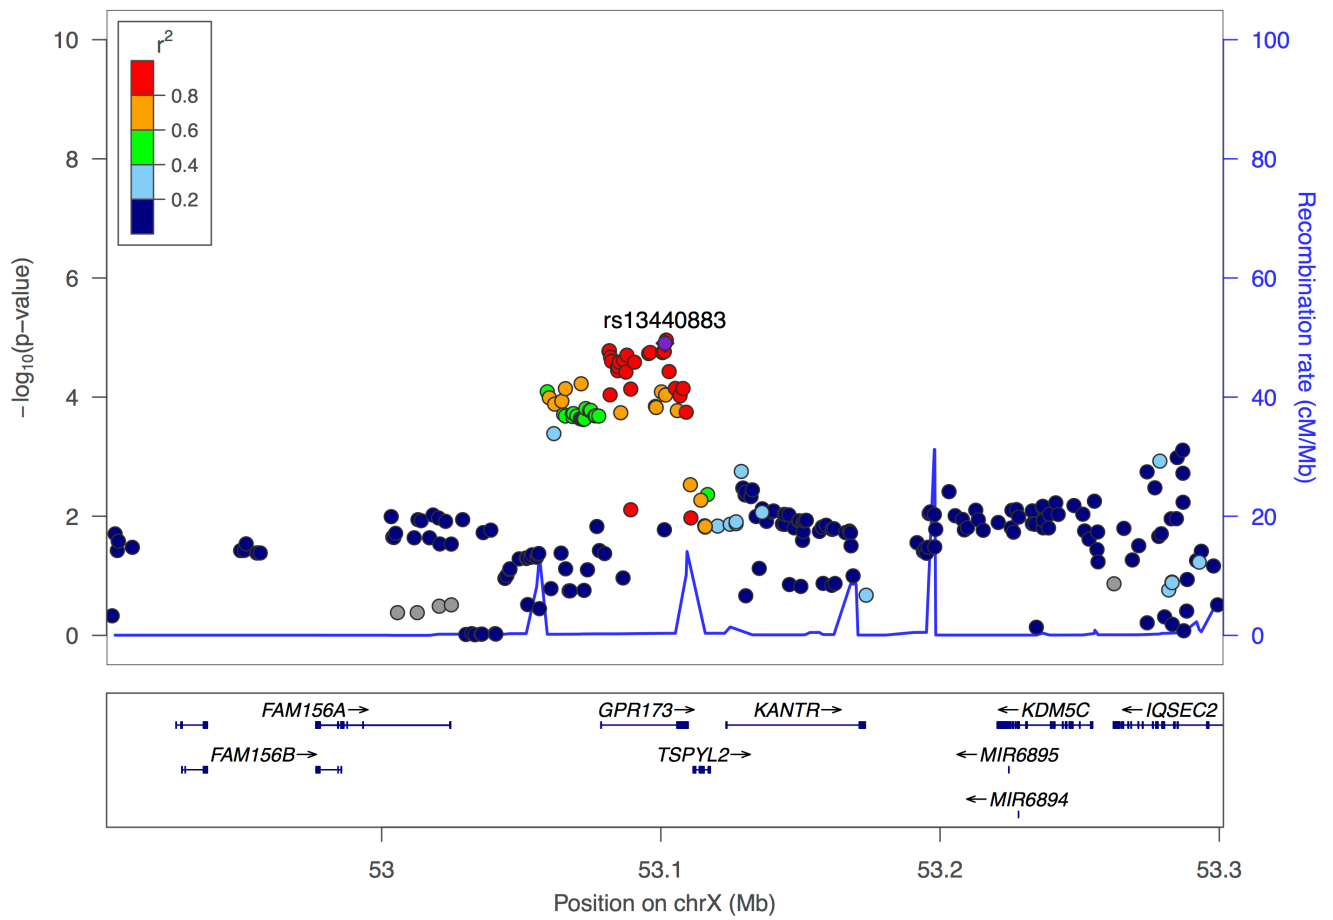

**Supplementary Figure 3. Identification of functional risk-associated SNV shared between Europeans and Asians.** (A) is the functional annotation of the SNPs around rs13440883 ( $\pm 30\text{kb}$ ). “LD EUR” is the LD pattern of European and “LD Asian” is the LD pattern of Asian, while “LD merge” is the composite of “LD EUR” and “LD Asian”. The green filled squares correspond to rs13440883, and green outlines indicate the SNVs in high LD ( $r^2 > 0.8$ ) with it in both Asian and European population. The SNV list could be found in Supplementary Table 6. Functional annotations of K562 and GM12878 cell lines were extracted from ENCODE<sup>23</sup> project. (B) and (C) are the volcano plots for the IGR results of rs13440883 and rs11091720, plotted with the TF(s) overlapping the corresponding SNV, and the color schemes are the same as used in (A). The area of the circle is proportional to the maximum average signal intensity of the two alleles.

**A**

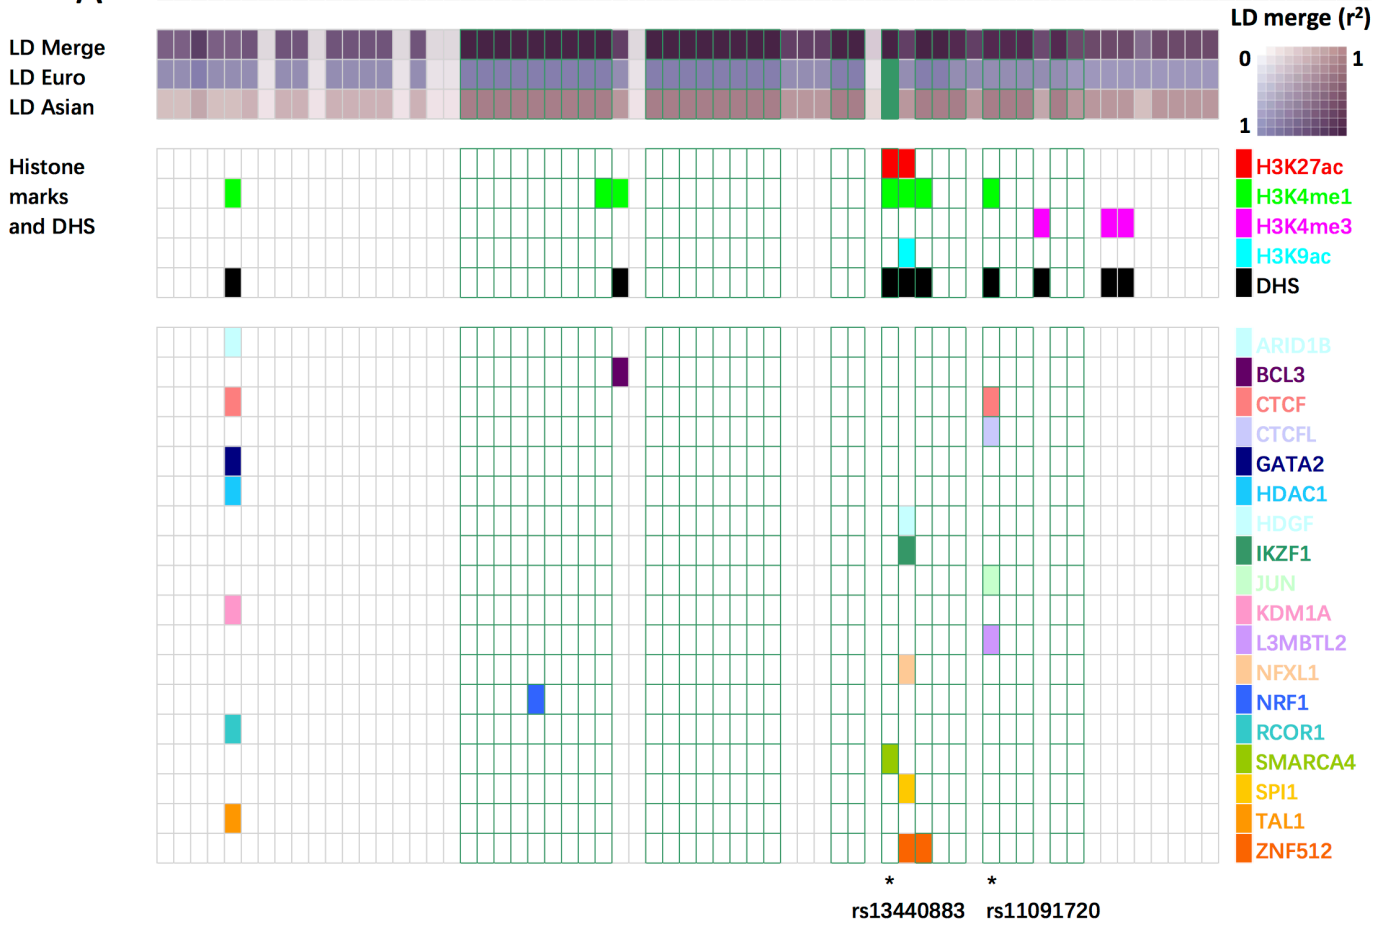

**B**

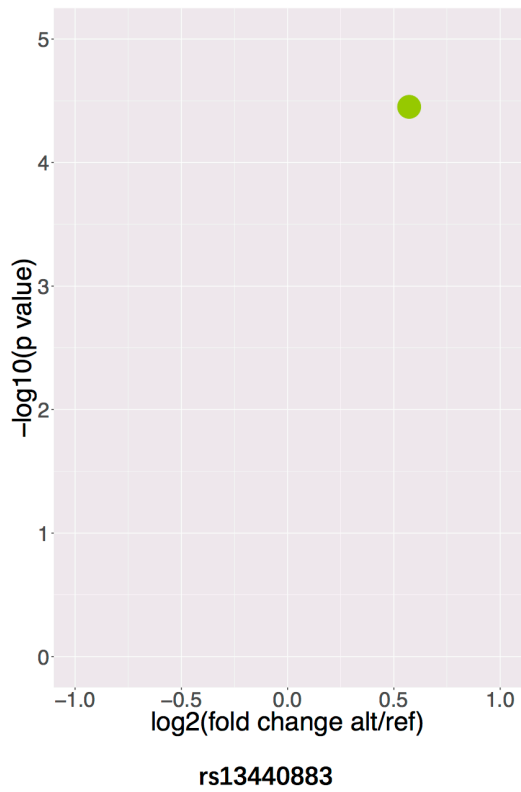

**C**

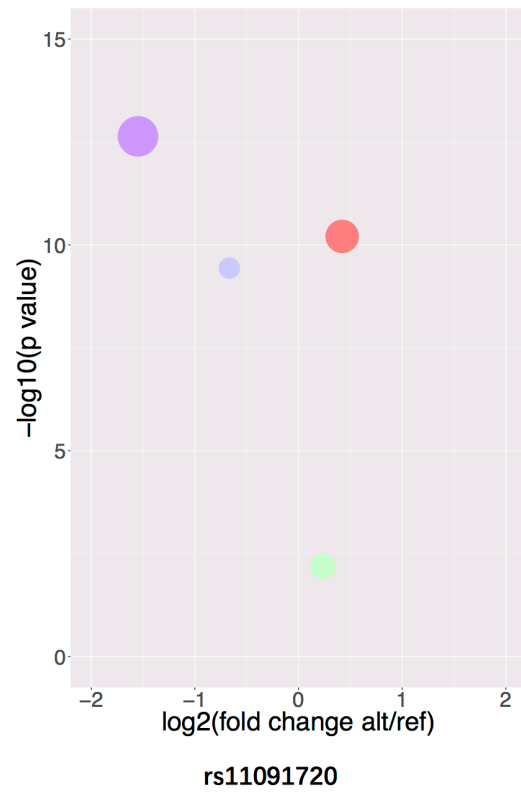

**Supplementary Figure 4. LD patterns ( $r^2$ ) of the risk-associated SNPs ( $P_{meta} < 1 \times 10^{-8}$ ) in *LICAM-MECP2* region, plotted by the GWAS data used in the current study.** From top to bottom are: the annotation of this region, the LD pattern of Anhui population, the LD pattern of Hong Kong population, and the LD pattern of European population. The suggested independent SNP rs5987175 is labeled in red and the top SNPs in other blocks are labeled with different color. LD blocks were indicated by blue outlines.

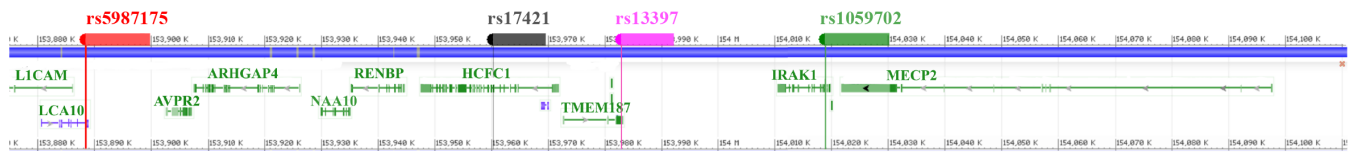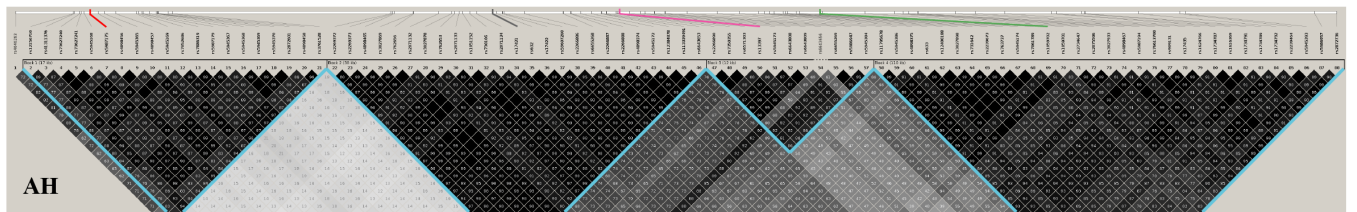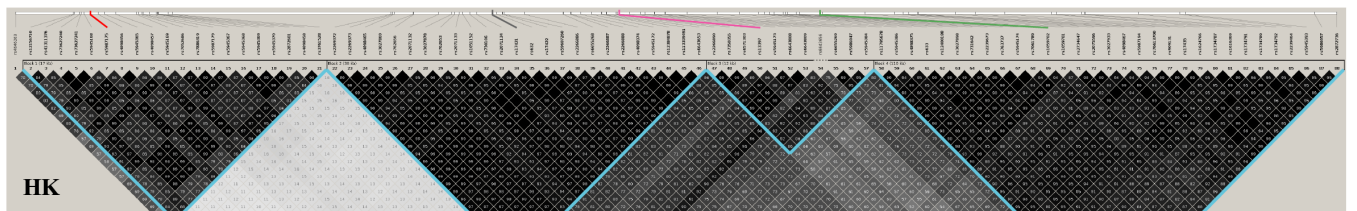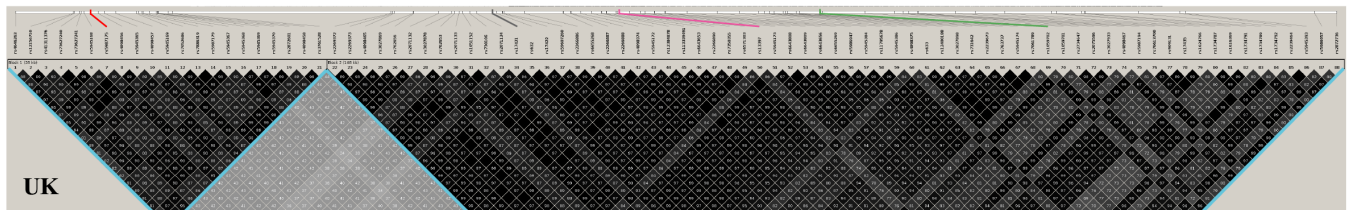

Supplement: MOESM1 [file 15737052]
